# Supplementary material
Source: PubMed Central journal article supplement (PMC8290908)
Supplement: NIHMS1611755-supplement-1.pdf [file NIHMS1611755-supplement-1.pdf]

**Figure A1: Percentage Distribution of *Hukou* Type among Intermarriages across *Hukou* Locality, by City.**

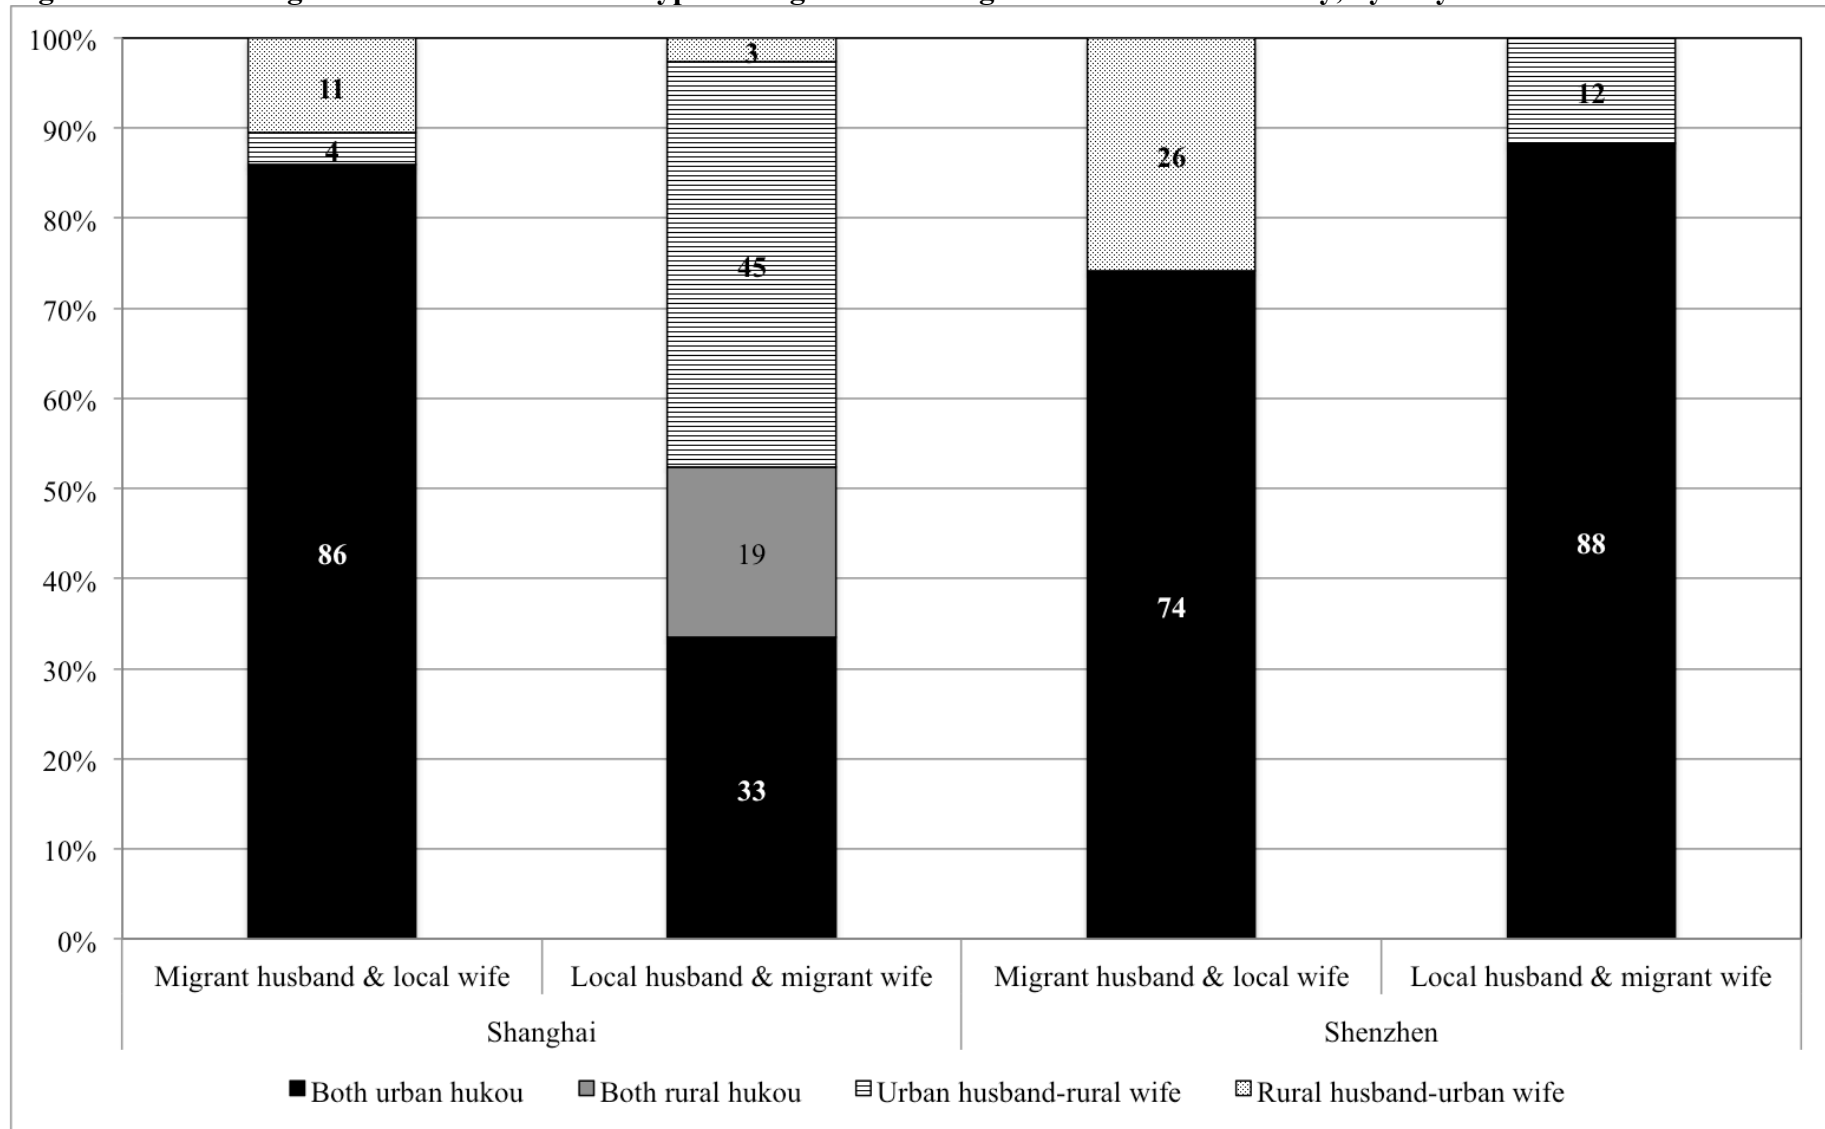

**Note:** percentages may not add up to 100% due to rounding.
